# Supplementary material for: Ratiometric fluorophore for quantification of iodide under physiological conditions: applications in urine analysis and live cell imaging
Source: Royal Society of Chemistry journal article supplement (doi:10.1039/c6ob00373g), 2016-01-01
Supplement: c6ob00373g1.pdf [file c6ob00373g1.pdf]

## Supporting Information

### **Ratiometric fluorophore for quantification of iodide under physiological conditions : Applications in urine analysis and live cell imaging**

Sana Sandhu<sup>a</sup>, Rahul Kumar<sup>a</sup>, Prabhpreet Singh<sup>a\*</sup>, Amandeep Walia<sup>b</sup>, Vanita Vanita<sup>b</sup>, Subodh Kumar<sup>a\*</sup>

**Corresponding author. Address:** Department of Chemistry, UGC Centre for Advanced Studies, Guru Nanak Dev University, Amritsar 143 005, India.

**Corresponding author. Mobile:** +91 9872361528.

**E-mail address:** [subodh\\_gndu@yahoo.com](mailto:subodh_gndu@yahoo.com)

| Contents                                                                                                           | Page No. |
|--------------------------------------------------------------------------------------------------------------------|----------|
| 1. Experimental Detail:<br>General Remarks                                                                         | S2       |
| 2. <sup>1</sup> H and <sup>13</sup> C NMR spectra of compound <b>4</b> , <b>6</b> and dipod <b>1</b> , <b>2</b>    | S3       |
| 3. HRMS spectra of compound <b>6</b> and dipod <b>1</b> , <b>2</b>                                                 | S6       |
| 4. UV and Fluorescence studies of dipod <b>1</b> with anions                                                       | S9       |
| 5. Interference studies of dipod <b>1</b>                                                                          | S9       |
| 6. <sup>1</sup> H NMR titration of dipod <b>1</b> with iodide                                                      | S10      |
| 7. Analysis of urine sample                                                                                        | S10      |
| 8. Table SI-1: Application of dipod <b>1</b> in determination of iodide ions in tap water, in the presence of NaCl | S11      |
| 9. MTT assay for bioimaging of iodide ions in live C6 glioma cells                                                 | S11      |

## 1. Experimental Details

**General Remarks:** All chemicals were obtained from common suppliers (Aldrich, Across, SDFCL, Spectrochem etc.) and used without further purification.  $^1\text{H}$  and  $^{13}\text{C}$  NMR spectra were recorded on BRUKER Bio spin AVANCE-III FT NMR HD-500 spectrophotometer using  $\text{CDCl}_3$  or  $\text{DMSO}-d_6$  as solvent and tetramethylsilane (TMS) as internal standard. Data are reported as follows: chemical shifts in ppm, coupling constants J in Hz; multiplicity (s = singlet, d = doublet, t = triplet, m = multiplet). High resolution mass spectra were recorded on BRUKER DALTONIK micrOTOF-Q11 spectrometer. The fluorescence titrations were performed on Varian Carey Eclipse fluorescence spectrophotometer and BH-CHRONOS spectrophotometer. The life-time studies were performed on BH-CHRONOS spectrophotometer and absorption spectra were recorded on Shimadzu-2450 spectrophotometer. The spectral data were analyzed through curve fitting procedures by using non-linear regression analysis SPECFIT 3.0.36 to determine the stability constants and the distribution of various species.

## 2. $^1\text{H}$ and $^{13}\text{C}$ NMR spectra of compound 4, 6 and dipod 1

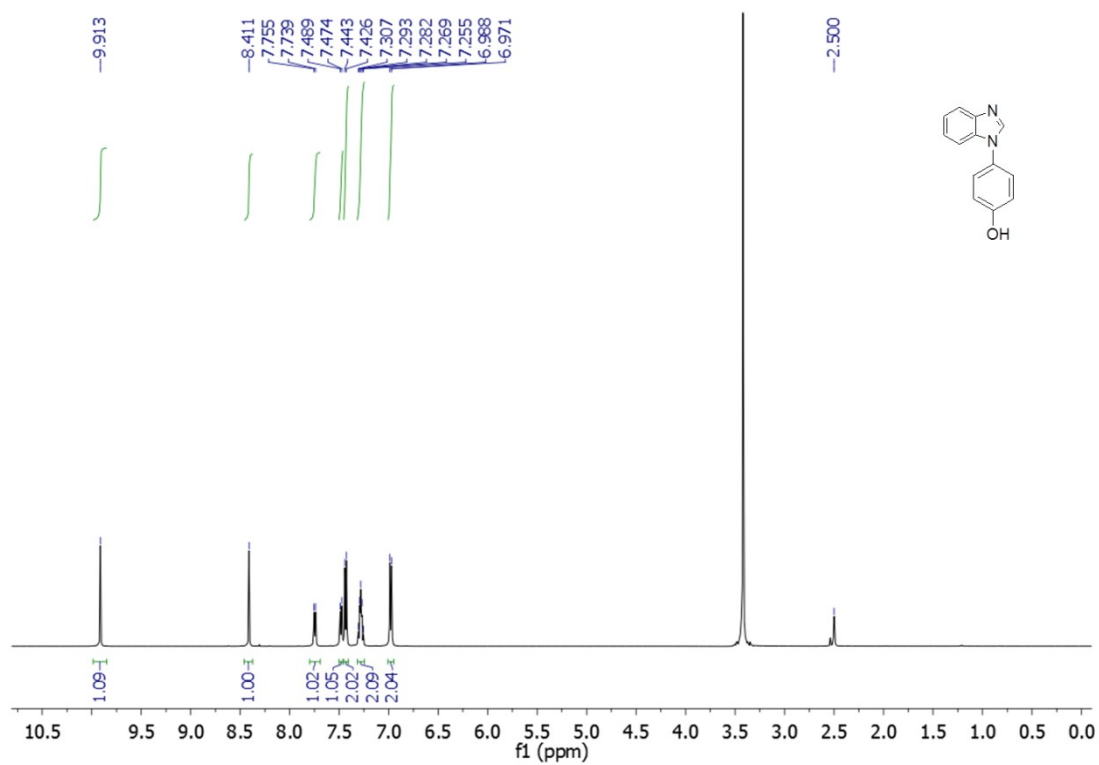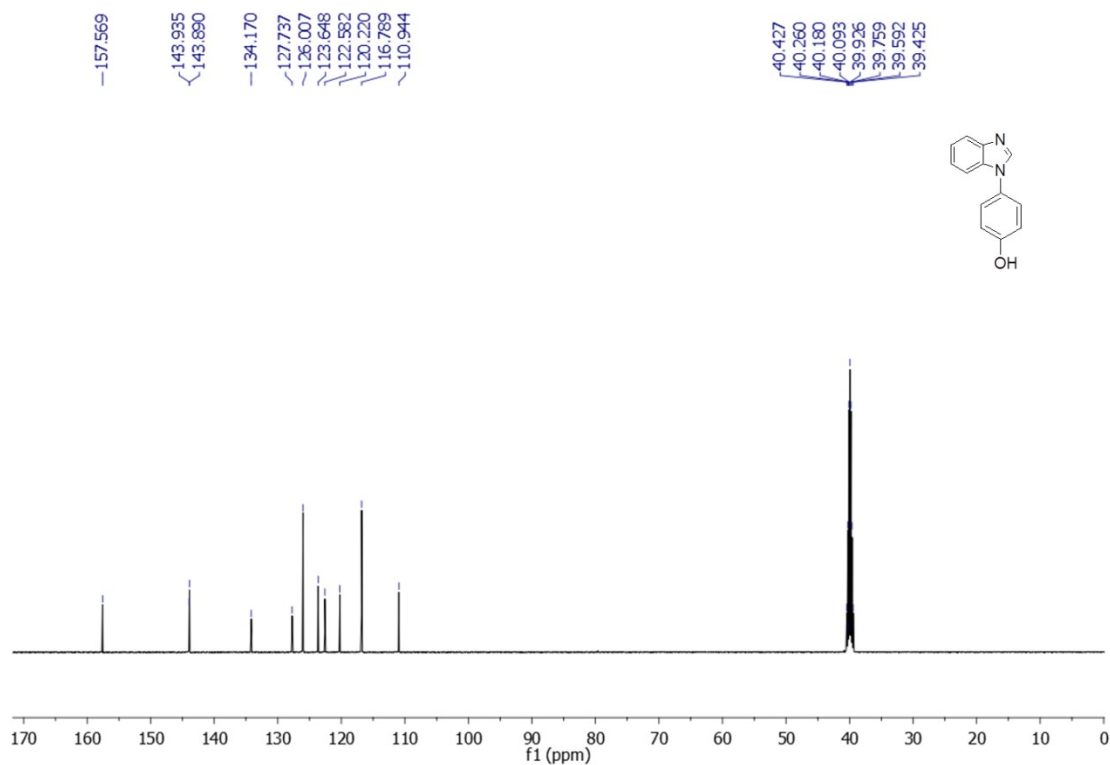

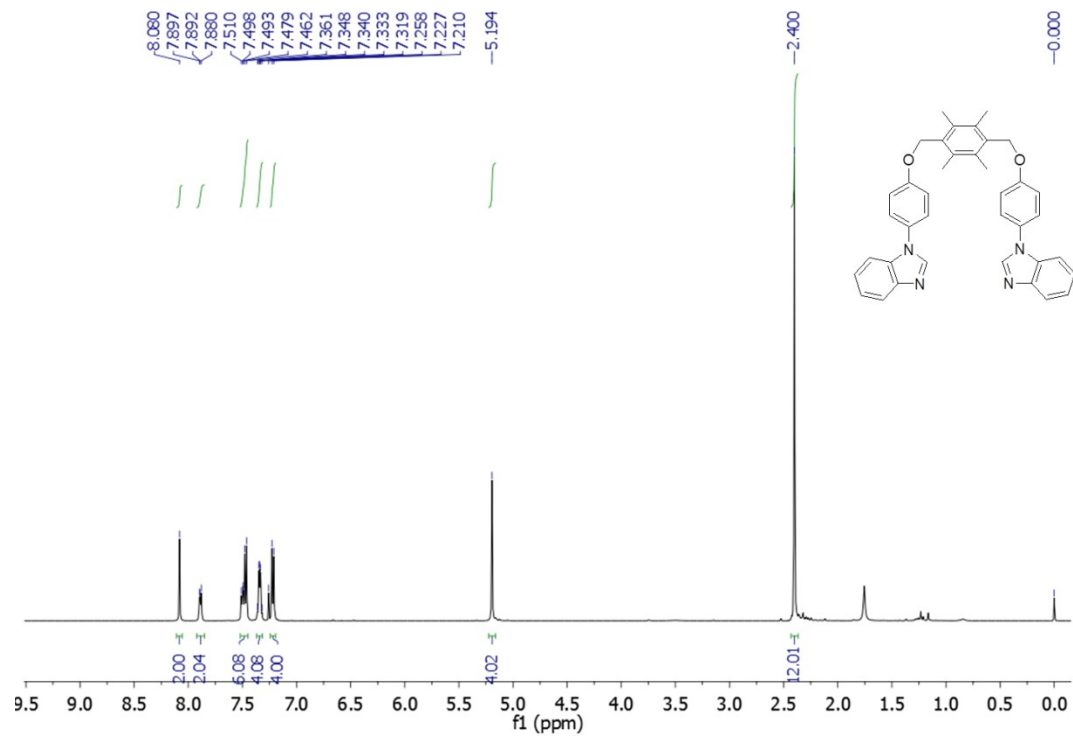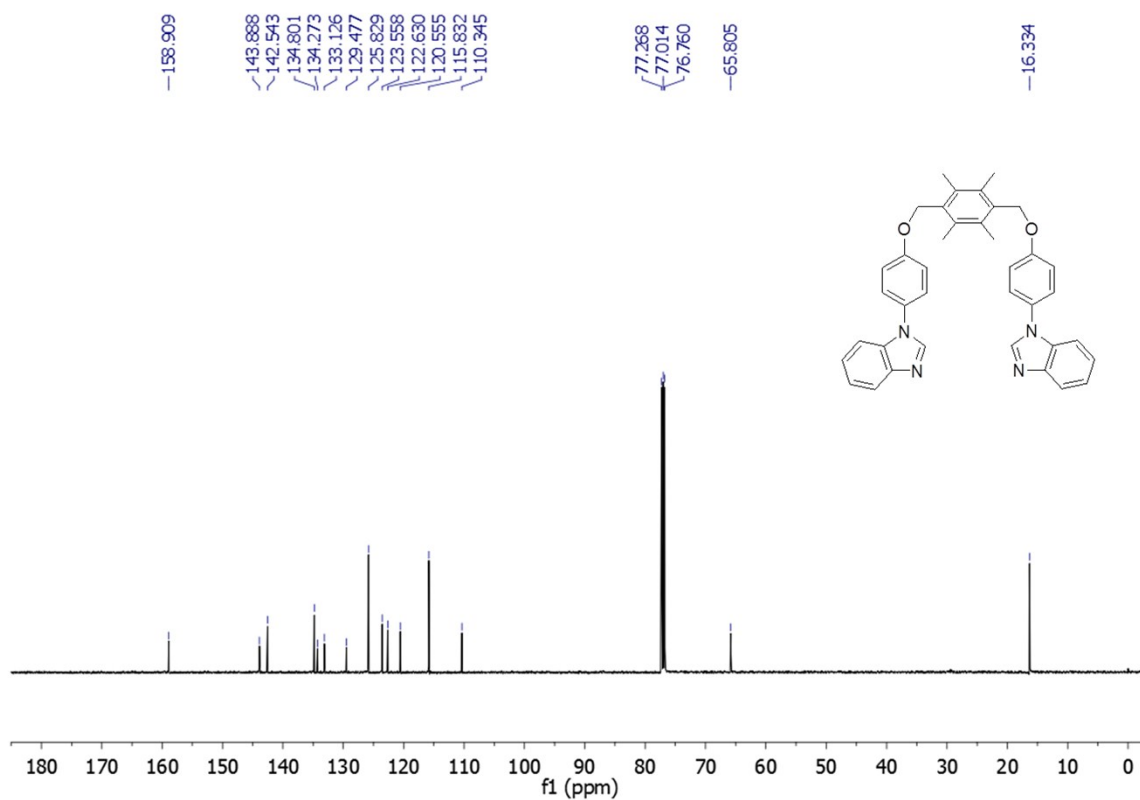

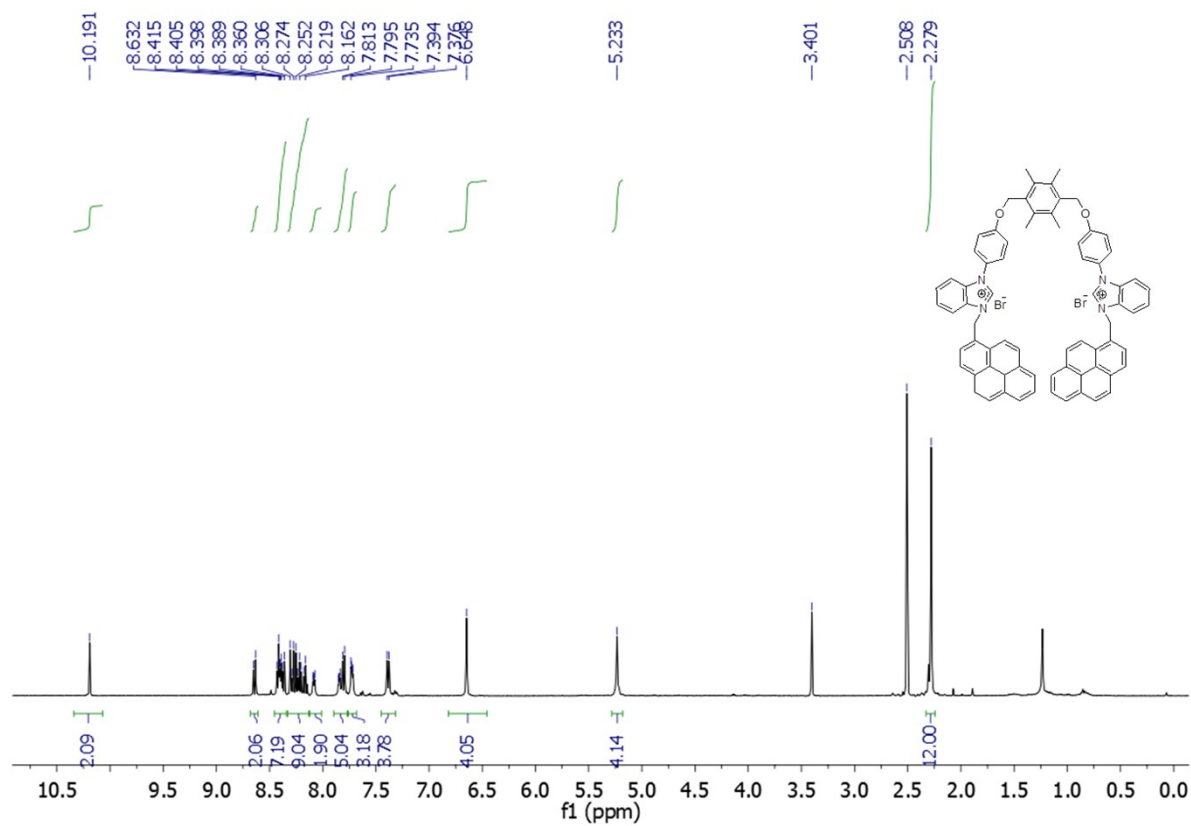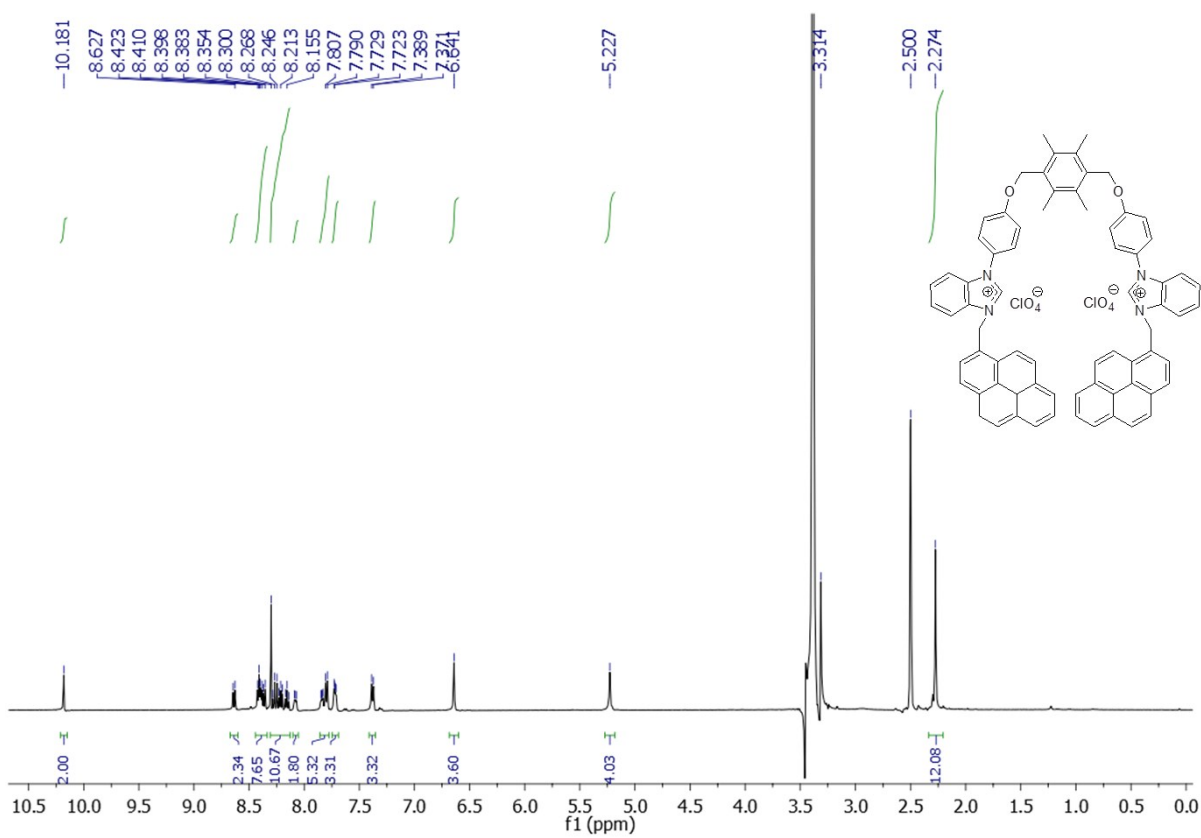

### 3. HRMS spectra of compound 6 and dipod 1, 2

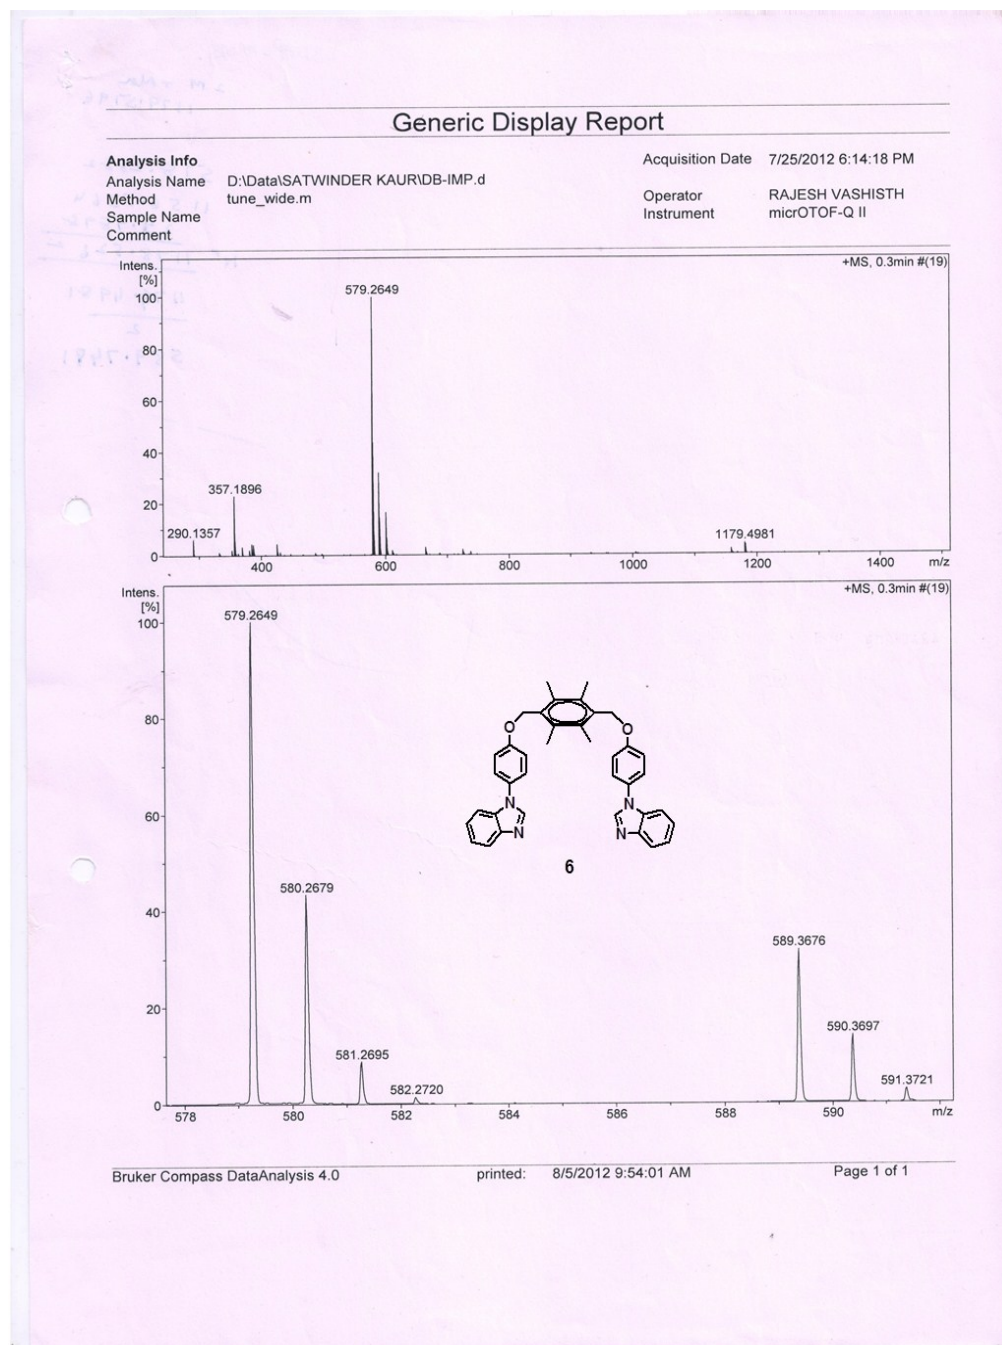

# Guru Nanak Dev University-Amritsar

## Analysis Info

Analysis Name D:\Data\user data\AMAN PHYSICS\SN-DBPY.d  
Method tune\_wide.m  
Sample Name sh-35  
Comment

Acquisition Date 11/8/2012 3:01:03 PM

Operator RAJESH VASHISTH  
Instrument microTOF-Q II 10356

## Acquisition Parameter

|             |            |                       |           |                  |           |
|-------------|------------|-----------------------|-----------|------------------|-----------|
| Source Type | ESI        | Ion Polarity          | Positive  | Set Nebulizer    | 0.4 Bar   |
| Focus       | Not active | Set Capillary         | 4500 V    | Set Dry Heater   | 180 °C    |
| Scan Begin  | 50 m/z     | Set End Plate Offset  | -500 V    | Set Dry Gas      | 4.0 l/min |
| Scan End    | 3000 m/z   | Set Collision Cell RF | 650.0 Vpp | Set Divert Valve | Waste     |

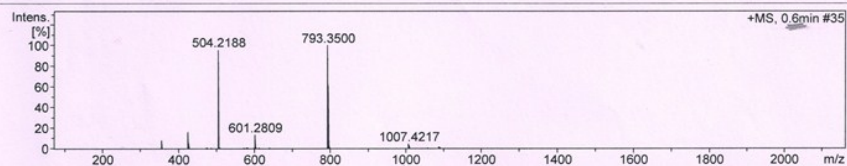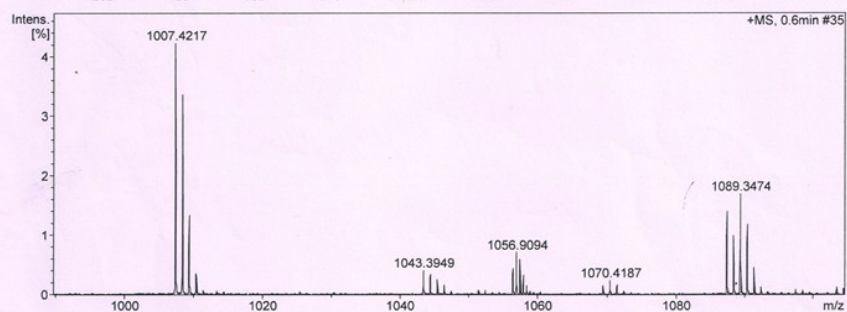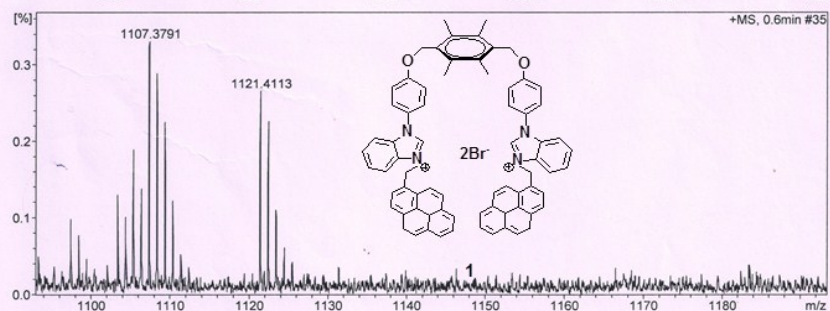

# Generic Display Report (all)

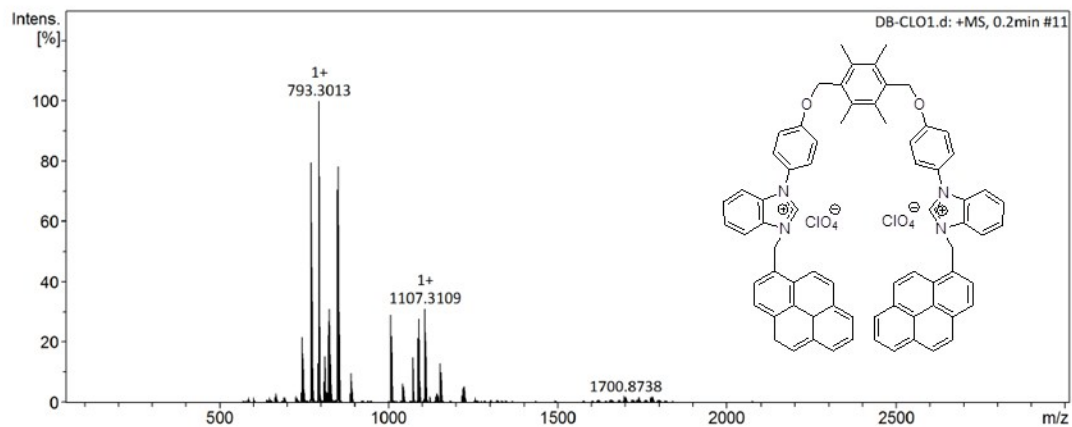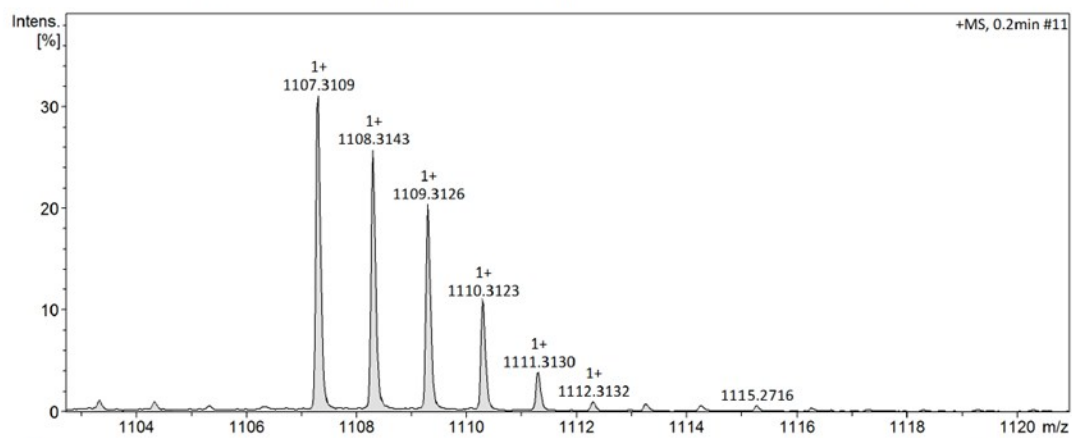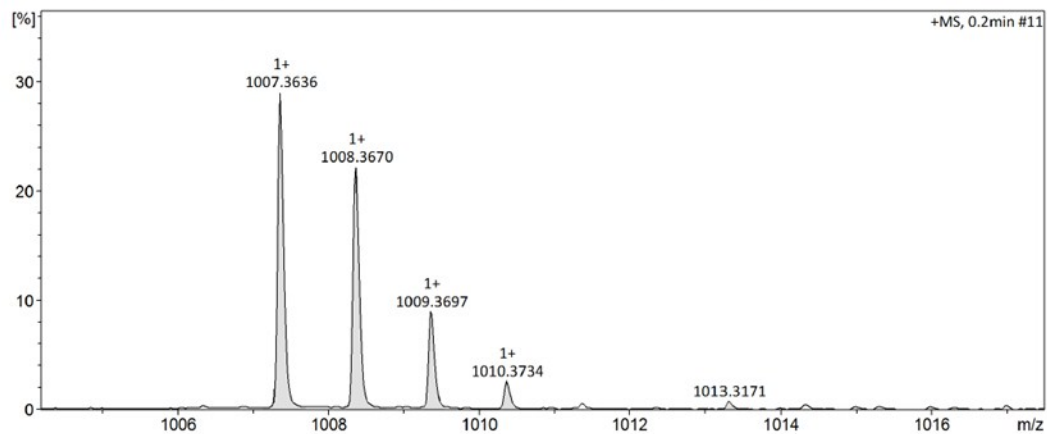



#### 4. UV and Fluorescence Studies of dipod 1 with anions

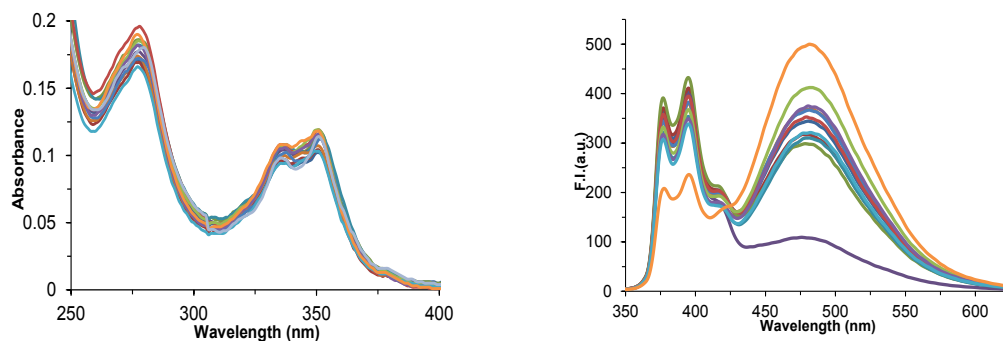

**Figure SI-1:** UV-Visible and emission spectra ( $\lambda_{\text{ex}} = 330 \text{ nm}$ ) of dipod **1** ( $5 \mu\text{M}$ ) with various anions ( $\text{F}^-$ ,  $\text{Cl}^-$ ,  $\text{Br}^-$ ,  $\text{I}^-$ ,  $\text{CN}^-$ ,  $\text{SCN}^-$ ,  $\text{SO}_4^{2-}$ ,  $\text{H}_2\text{PO}_4^{2-}$ ,  $\text{NO}_3^-$ ,  $\text{AcO}^-$ ,  $\text{OH}^-$ ,  $\text{ClO}_4^-$ ,  $25 \mu\text{M}$ ) in 95 % aqueous Hepes buffer (5 % DMSO), pH = 7.4

#### 5. Interference studies of dipod 1

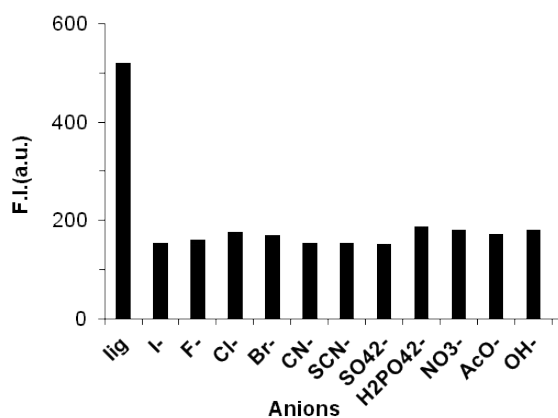

**Figure SI-2:** Variation of fluorescence intensity at 480 nm for complex between dipod **1** ( $5 \mu\text{M}$ ) and iodide ( $5 \mu\text{M}$ ) in the presence of different anions ( $50 \mu\text{M}$ ) in pH 7.4 HEPES buffer - 5% DMSO ( $\lambda_{\text{ex}} = 330 \text{ nm}$ )

## 6. $^1\text{H}$ NMR titration of dipod **1** with iodide

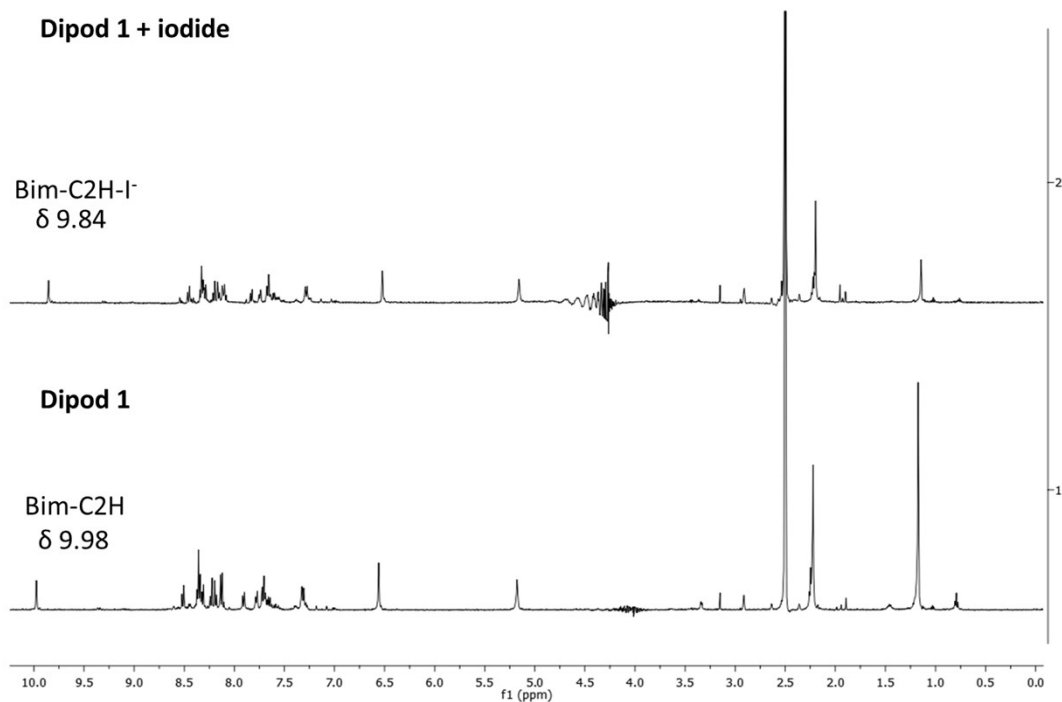

**Figure SI-3:**  $^1\text{H}$  NMR titration of dipod **1** with iodide ions in  $\text{dmso-}d_6\text{-H}_2\text{O}$  mixture at 500 MHz

## 7. Analysis of urine sample

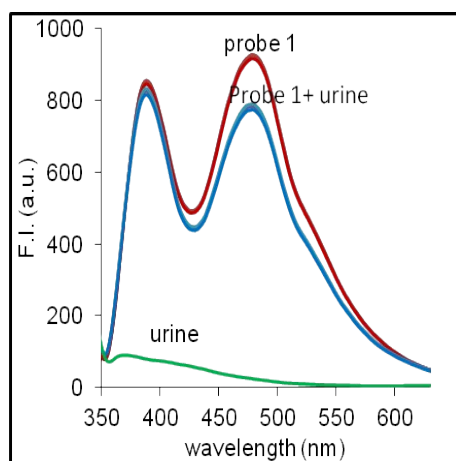

**Figure SI-4:** Fluorescence spectra of probe **1**, probe **1**+ urine and urine sample

**8. Table SI-1: Application of dipod 1 in determination of iodide ions in tap water, in the presence of NaCl and in blood serum samples**

| S. No.                                                                                                                                                                                 | Conc. $\text{ClO}_4^-$ (nM) | Conc. determined $\pm \text{SD}^a$ (nM) | Relative error (%) |
|----------------------------------------------------------------------------------------------------------------------------------------------------------------------------------------|-----------------------------|-----------------------------------------|--------------------|
| <b>Tap water</b><br><i>Maximum relative standard deviation <math>\leq 1.70</math> and PRSD = 1.46</i><br><i>Maximum relative error <math>\leq 1.30</math> and PRE = 1.08</i>           |                             |                                         |                    |
| 1                                                                                                                                                                                      | 0.5                         | $0.51 \pm 0.007$                        | 1.04               |
| 2                                                                                                                                                                                      | 5                           | $5.21 \pm 0.09$                         | 1.30               |
| 3                                                                                                                                                                                      | 50                          | $50.15 \pm 0.63$                        | 0.9                |
| 4                                                                                                                                                                                      | 500                         | $501.5 \pm 8.02$                        | 1.20               |
| 5                                                                                                                                                                                      | 5000                        | $5005 \pm 66.4$                         | 1.01               |
| <b>In presence of NaCl</b><br><i>Maximum relative standard deviation <math>\leq 1.82</math> and PRSD = 1.38</i><br><i>Maximum relative error <math>\leq 1.41</math> and PRE = 1.02</i> |                             |                                         |                    |
| 1                                                                                                                                                                                      | 0.5                         | $0.52 \pm 0.006$                        | 1.04               |
| 2                                                                                                                                                                                      | 5                           | $5.10 \pm 0.12$                         | 1.41               |
| 3                                                                                                                                                                                      | 50                          | $50.12 \pm 0.69$                        | 1.02               |
| 4                                                                                                                                                                                      | 500                         | $502.0 \pm 5.7$                         | 0.80               |
| 5                                                                                                                                                                                      | 5000                        | $5001.0 \pm 60.5$                       | 0.84               |

**9. MTT assay for bioimaging of iodide ions in live C6 glioma cells**

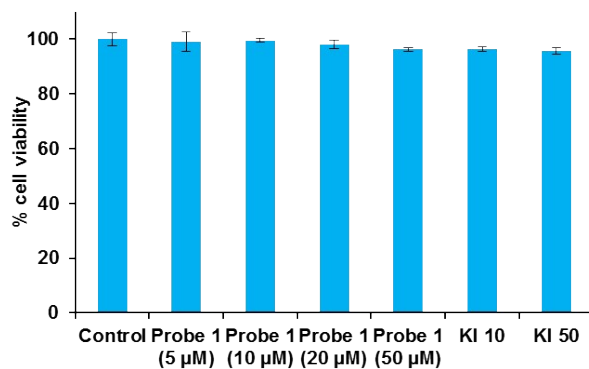

**Figure SI-5: MTT assay of dipod 1 and KI**
